# Supplementary material for: The Metabolite Repair Enzyme Phosphoglycolate Phosphatase Regulates Central Carbon Metabolism and Fosmidomycin Sensitivity in Plasmodium falciparum
Source: PubMed Central journal article supplement (PMC6904873; doi:10.1128/mbio.02060-19), 2019-12-10

Figure S3

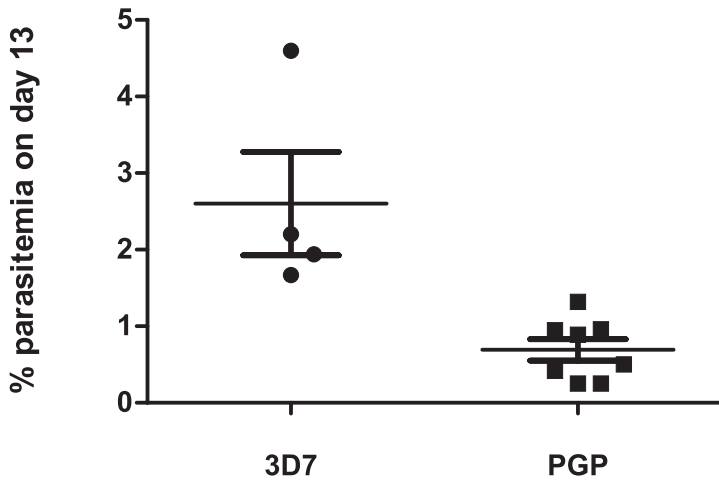

Supplement: mBio.02060-19-sf003.pdf [file mBio.02060-19-sf003.pdf]
